# Supplementary material for: Next-Generation Ultrasol Curcumin Boosts Muscle Endurance and Reduces Muscle Damage in Treadmill-Exhausted Rats
Source: MDPI journal article supplement (doi:10.3390/antiox10111692), 2021-10-26
Supplement: s1 [file s1]

# Next-generation ultrasol curcumin boosts muscle endurance and reduces muscle damage in treadmill-exhausted rats

Emre Sahin<sup>1</sup>, Cemal Orhan<sup>2</sup>, Fusun Erten<sup>3</sup>, Besir Er<sup>4</sup>, Manutosh Acharya<sup>5</sup>, Abhijeet A. Morde<sup>5</sup>, Muralidhara Padigar<sup>5</sup>, Kazim Sahin<sup>2\*</sup>,

<sup>1</sup> Department of Animal Nutrition, Faculty of Veterinary Medicine, Bingol University, Bingol 12000, Turkey; esahin@bingol.edu.tr (E.S.)

<sup>2</sup> Department of Animal Nutrition, Faculty of Veterinary Medicine, Firat University, Elazig 23119, Turkey; corhan@firat.edu.tr (C.O.); nsahinkm@yahoo.com (K.S.)

<sup>3</sup> Department of Veterinary Science, Pertek Sakine Genc Vocational School, Munzur University, Tunceli, Turkey.; fusunerten@munzur.edu.tr (F.E.)

<sup>4</sup> Department of Biology, Faculty of Science, Firat University, Elazig 23119, Turkey; beshir.er@hotmail.com (B.E.)

<sup>5</sup> Research and Development, OmniActive Health Technologies, Mumbai, India; m.acharya@omniactives.com (M.A.); a.morde@omniactives.com (A.A.M); m.padigar@omniactives.com (M.P.)

\* Correspondence: nsahinkm@yahoo.com (K.S.); Tel.: +90-532-7473506 Phone: +904242370000/3938

A

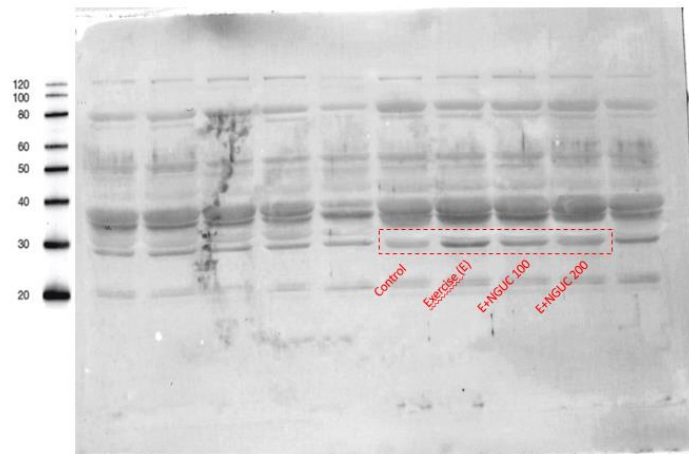

B

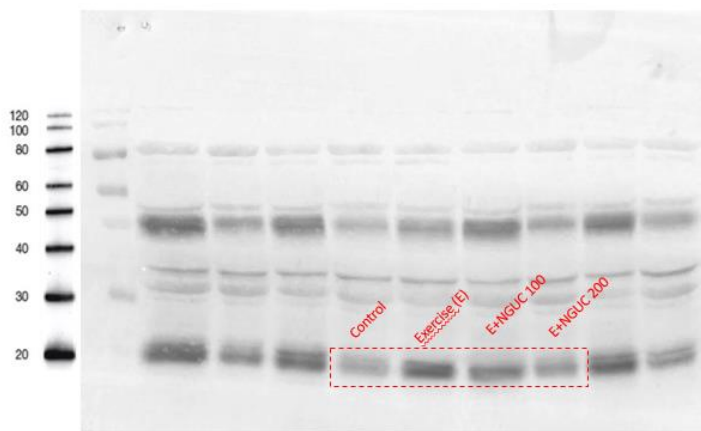

C

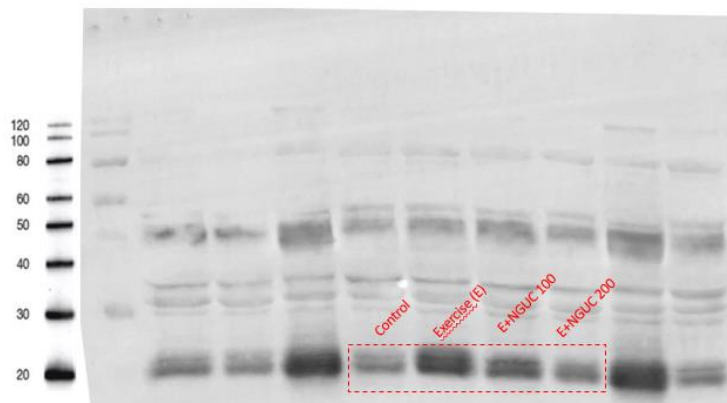

D

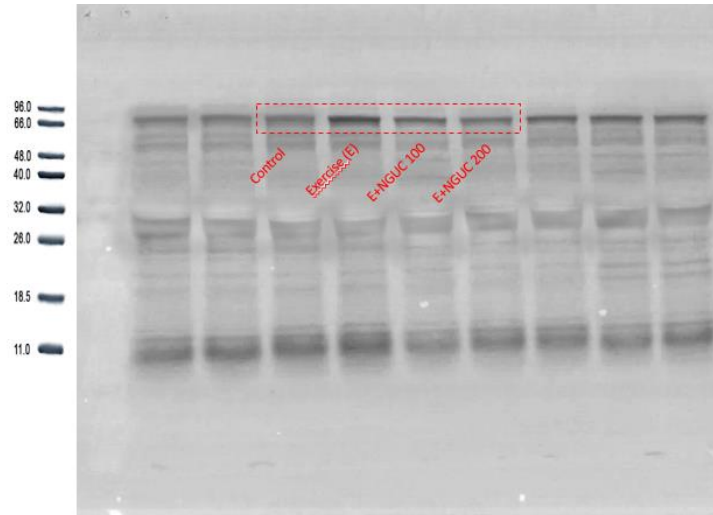

E

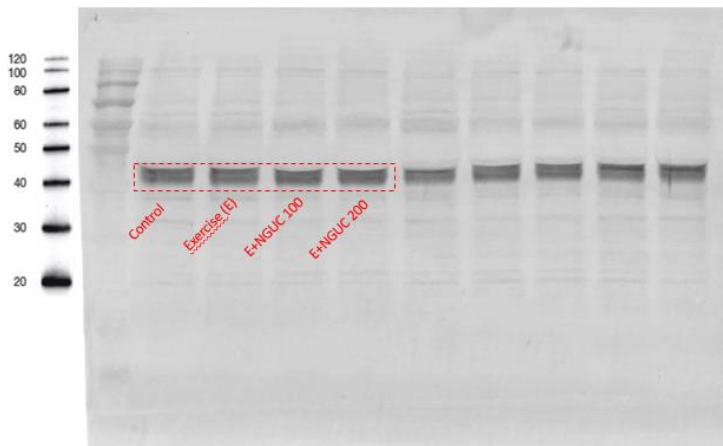

**Supplementary Figure S1.** Full immunoblots related to Figure 5 muscle tissue ((A) IL-1 $\beta$ , (B) IL-6, (C) TNF- $\alpha$ , (D) PGC-1 $\alpha$ , and (E)  $\beta$ -Actin). Each immunoblot is a representative of three independent experiments. Results shown in Fig.5 are delineated by red dotted rectangles. MW (in kDa) are indicated.

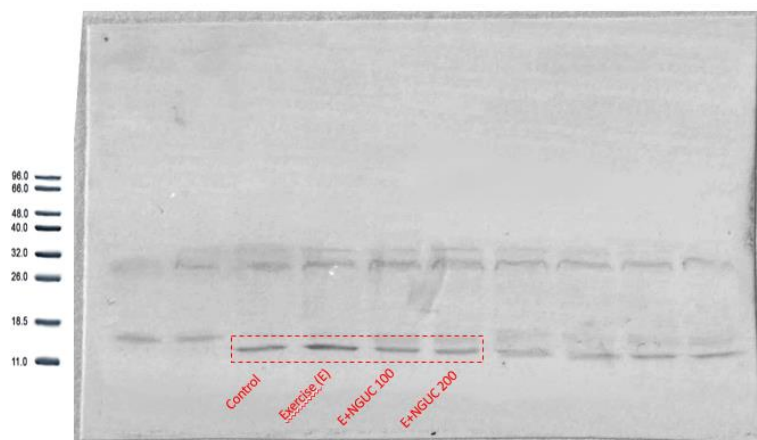

B

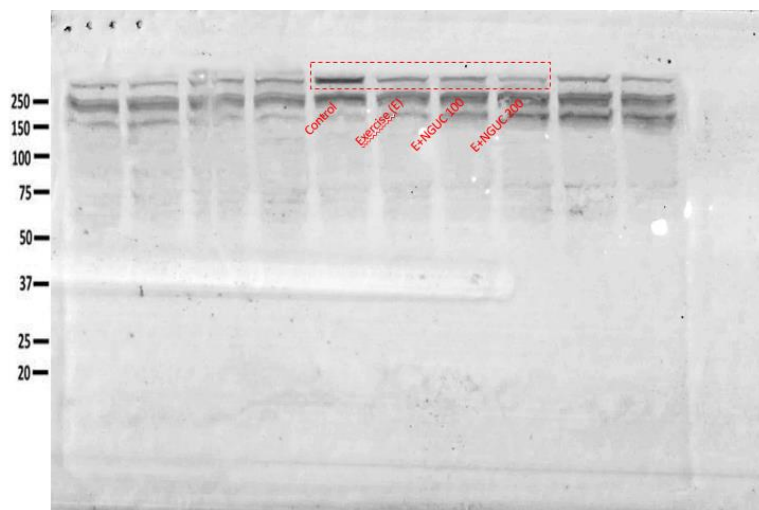

C

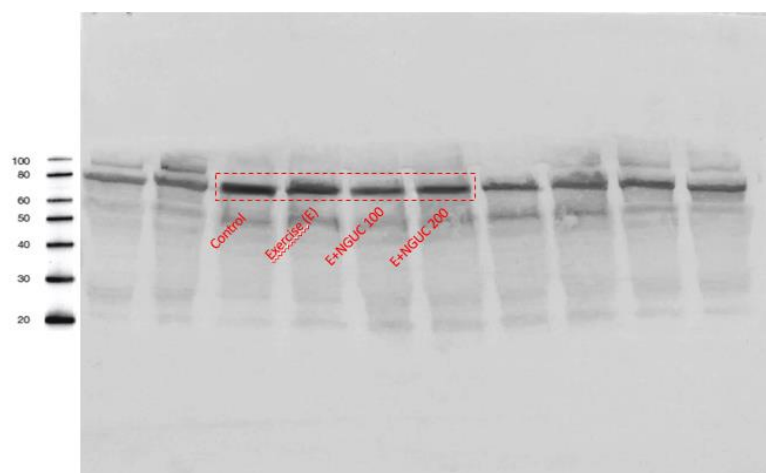

D

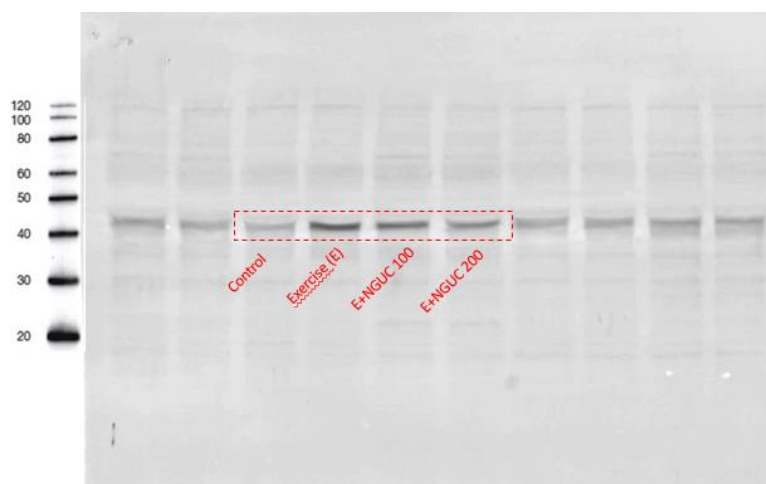

E

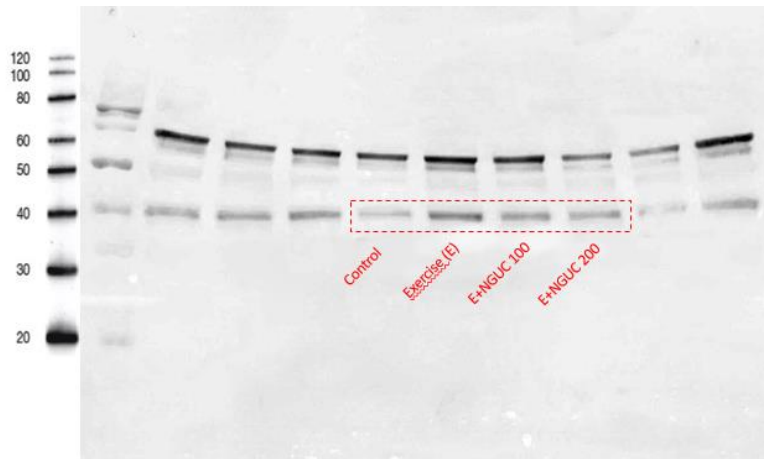

F

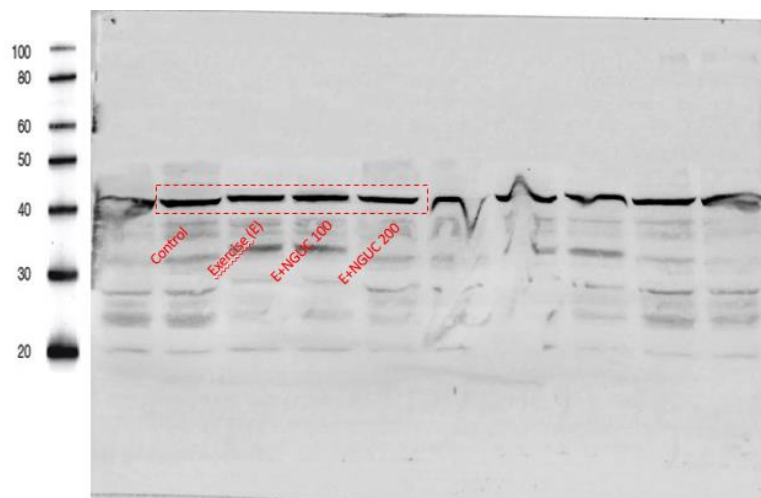

**Supplementary Figure S2.** Full immunoblots related to Figure 6 muscle tissue ((A) p-4E-BP1, (B) p-mTOR, (C) p-70S6K1, (D) MAFbx, (E) MuRF-1 and (F)  $\beta$ -Actin). Each immunoblot is a representative of three independent experiments. Results shown in Fig.6 are delineated by red dotted rectangles. MW (in kDa) are indicated.
